# Supplementary material
Source: HighWire-hosted journal article supplement (https://thorax.bmj.com/content/74/9/914)
Supplement: inline-supplementary-material-1 [file inline-supplementary-material-1.pdf]

1    **Supplementary File 1.**

2

3    The following Retinitis Pigmentosa genotypes were identified in patients involved in this  
4    study.

5

6    C1218-1219delAT(p.Ala408fs) in exon 10

7    C706delc9p.Gln236fs) in exon 7

8    C2362.2366del15

9    C.2252.2255del14

10    C.2509G>Tp.Glu837X

11    C.1754-2dupA
